# Supplementary material for: An Au@NH2-MIL-125(Ti)-based multifunctional platform for colorimetric detections of biomolecules and Hg2+
Source: Royal Society of Chemistry journal article supplement (doi:10.1039/c9tb02183c), 2019-11-28
Supplement: c9tb02183c1.pdf [file c9tb02183c1.pdf]

## Electronic Supplementary information

for

### Au@NH<sub>2</sub>-MIL-125-based Multifunctional Platform for Colorimetric Detections of Biomolecules and Hg<sup>2+</sup>

Yanmei Zhang<sup>1,3\*</sup>, Jie Song<sup>1,3</sup>, Qiaoling Pan<sup>1,3</sup>, Xin Zhang<sup>1,3</sup>, Wenhui Shao<sup>1,3</sup>, Xiang Zhang<sup>1,3</sup>, Chunshan Quan<sup>1,3</sup>,

Jun Li<sup>2\*</sup>

<sup>1</sup> College of Life Science, Dalian Minzu University, Economical and Technological Development Zone, Dalian, 116600, China; <sup>2</sup>State Key Laboratory of Catalysis, Dalian Institute of Chemical Physics, Chinese Academy of Science, P. O. Box 110, Dalian 116023, China <sup>3</sup>Key Laboratory of Biotechnology and Bioresources Utilization (Dalian Minzu University), Ministry of Education, China

Corresponding authors: ymzhang@dlmu.edu.cn (Y. Zhang); jli@dicp.ac.cn (J. Li)

**Table S1** Comparison of different methods for H<sub>2</sub>O<sub>2</sub> sensors

| Method Reference                           | Linear range   | Detection limit (μM) |
|--------------------------------------------|----------------|----------------------|
| Electrochemical analysis <sup>[1]</sup>    | 20 μM to 20mM  | 2.95                 |
| Flow injection <sup>[2]</sup>              | 0.1-1 mM       | 20                   |
| Fluorometry <sup>[3]</sup>                 | 80-420 μM      | 11                   |
| Batch injection <sup>[4]</sup>             | 100-600 μM     | 10                   |
| Colorimetric <sup>[5]</sup>                | 4-40 μM        | 1.7-2                |
| <b>Colorimetric</b> <sup>[this work]</sup> | <b>2-10 μM</b> | <b>0.24</b>          |

**Table S2** Comparison of the different methods for cysteine sensors

| Method Reference                    | Nanozyme                         | Linear range | Detection limit (μM) |
|-------------------------------------|----------------------------------|--------------|----------------------|
| Colorimetric <sup>[6]</sup>         | UiO-66-NH <sub>2</sub>           | 5-120 μM     | 0.306                |
| Colorimetric <sup>[7]</sup>         | Ce-MOF                           | 0.1-1μM      | 0.14                 |
| Colorimetric <sup>[8]</sup>         | MoS <sub>2</sub> -polypyrrole-Pd | 1-10 μM      | 0.08                 |
| Colorimetric <sup>[9]</sup>         | FeCo-CNFs                        | 1-20 μM      | 0.15                 |
| Colorimetric <sup>[10]</sup>        | mesoporous NiO                   | 20-100 μM    | 1.1                  |
| Colorimetric <sup>[this work]</sup> | Au@NH <sub>2</sub> -MIL-125      | 1-10μM       | 0.14                 |

**Table S3** Comparison of the different methods for Hg<sup>2+</sup> sensors

| Method Reference                   | Materials                       | Linear range     | Detection limit |
|------------------------------------|---------------------------------|------------------|-----------------|
| Colorimetry <sup>[11]</sup>        | BSA-AuNCs-EDTA                  | 0.2 -60 $\mu$ M  | 30 nM           |
| Fluorimetry <sup>[12]</sup>        | TEA-CdSe-QDs                    | 4.0 -35 $\mu$ M  | 190 nM          |
| Fluorimetry <sup>[13]</sup>        | Trypsin-AuNCs                   | 20-500 nM        | 50 nM           |
| Colorimetry <sup>[14]</sup>        | DNA/AuNPs                       | 0-5 $\mu$ M      | 500 nM          |
| Colorimetry <sup>[15]</sup>        | MVC-MOF                         | 0.05-6 $\mu$ M   | 11 nM           |
| Colorimetry <sup>[16]</sup>        | G-quadruplex                    | 0.05-2.5 $\mu$ M | 50 nM           |
| Colorimetry <sup>[17]</sup>        | Ag@GO                           | 10-200 $\mu$ M   | 338 nM          |
| Colorimetry <sup>[this work]</sup> | Au@NH <sub>2</sub> -MIL-125(Ti) | 1-5 $\mu$ M      | 100 nM          |

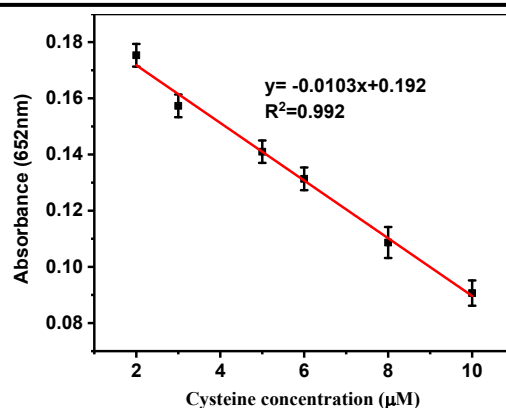**Fig. S1.** Linear relationship of the absorbance intensity of A652 against Cys concentrations in fetal bovine serum sample (2.0 $\mu$ M, 3.0 $\mu$ M, 5.0  $\mu$ M, 6.0  $\mu$ M, 8.0  $\mu$ M, 10  $\mu$ M). Error bars are obtained according to five independent measurements.**References:**

- [1]. Wang L, Xu M, Xie Y, Song Y, Wang L. A nonenzymatic electrochemical H<sub>2</sub>O<sub>2</sub> sensor based on macroporous carbon/polymer foam/PtNPs electrode. *J Mater Sci.* 2018;53:10946-54.
- [2]. Reanpang P, Themsirimongkon S, Saipanya S, Chailapakul O, Jakmunee J. Cost-effective flow injection amperometric system with metal nanoparticle loaded carbon nanotube modified screen printed carbon electrode for sensitive determination of hydrogen peroxide. *Talanta.* 2015;144:868-74.
- [3]. Wannajuk K, Jamkatokem, Tuntulani T, Tomapatanaet B. Highly specific-glucose fluorescence sensing based on boronic anthraquinone derivatives via the GOx enzymatic reaction. *Tetrahedron.* 2012;68:8899-904.
- [4]. Silva RAB, Montes RHO, Richter EM, Munoz RAA. Rapid and selective determination of hydrogen peroxide residues in milk by batch injection analysis with amperometric detection. *Food Chem.* 2012;133:200-4.
- [5]. Liu H, Ma H, Xu H, Wen J, Huang Z, Qiu Y, et al. Hollow and porous nickel sulfide nanocubes prepared from a metal-organic framework as an efficient enzyme mimic for colorimetric detection of

hydrogen peroxide. *Analytical and bioanalytical chemistry* 2019;411:129-37.

- [6] Z.M. Hu, X. Jiang, F.J. Xu, J. Jia, Z. Long, X.D. Hou, Colorimetric sensing of bithiols using photocatalytic UiO-66(NH<sub>2</sub>) as H<sub>2</sub>O<sub>2</sub>-free peroxidase mimics, *Talanta* 2016;158: 276e282.
- [7] R. Dalapati, B. Sakthivel, M.K. Ghosal, A. Dhakshinamoorthy, S. Biswas, A cerium-based metal organic framework having inherent oxidase-like activity applicable for colorimetric sensing of biothiols and aerobic oxidation of thiols, *CrystEngComm* 2017;19: 5915e5925.
- [8] M. Chi, Y. Zhu, L. Jing, C. Wang, X. Lu. Fabrication of ternary MoS<sub>2</sub>-polypyrrole-Pd nanotubes as peroxidase mimics with a synergistic effect and their sensitive colorimetric detection of L-cysteine. *Analytica Chimica Acta*. 2018;1035;146-53.
- [9] Z.Z. Yang, Y. Zhu, G.D. Nie, M.X. Li, C. Wang, X.F. Lu, FeCo nanoparticles embedded carbon nanofibers as robust peroxidase mimics for sensitive colorimetric detection of L-cysteine, *Dalton Trans.* 2017;46: 8942-8949.
- [10] C. Ray, S. Dutta, S. Sarkar, R. Sahoo, A. Roy, T. Pal, Intrinsic peroxidase-like activity of mesoporous nickel oxide for selective cysteine sensing, *J. Mater. Chem. B* 2014; 2; 6097-6105.
- [11]. Y. Wang, S. Tang, H. Yang, H. Song. A novel colorimetric assay for rapid detection of cysteine and Hg<sup>2+</sup> based on gold clusters. *Talanta*. 2016;146:71-4.
- [12]. Z.B. Shang, Y. Wang, W.J. Jin, Triethanolamine-capped CdSe quantum dots as fluorescent sensors for reciprocal recognition of mercury (II) and iodide in aqueous solution. *Talanta* 2009; 78: 364-369.
- [13] H. Kawasaki, K. Yoshimura, K. Hamaguchi, R. Arakawa, Trypsin-stabilized fluorescent gold nanocluster for sensitive and selective Hg<sup>2+</sup> detection, *Anal. Sci.* 2011;27: 591.
- [14] X. Xu, J. Wang, K. Jiao, X. Yang, Colorimetric detection of mercury ion (Hg<sup>2+</sup>) based on DNA oligonucleotides and unmodified gold nanoparticles sensing system with a tunable detection range *Biosens. Bioelectron.* 2009; 24:3153-3158.
- [15] C. Wang, G. Tang, H. L. Tan, Colorimetric determination of mercury(II) via the inhibition by ssDNA of the oxidase-like activity of a mixed valence state cerium-based metal-organic framework, *Microchimica Acta*. 2018; 185:475-483
- [16] T. Li, S. Dong, E. Wang. Label-free colorimetric detection of aqueous mercury ion (Hg<sup>2+</sup>) using Hg<sup>2+</sup>-modulated G-quadruplex-based DNAzymes. *Anal Chem* 2009;81:2144-2149
- [17] K.Z. Kamali, A. Pandikumar, S. Jayabal, R. Ramaraj, H.N. Lim, B.H. Ong, Amalgamation based optical and colorimetric sensing of mercury (II) ions with silver@graphene oxide nanocomposite materials. *Microchimica Acta* 2016;183:369-77
